# Supplementary material for: Animal burrowing at cold seep ecotones boosts productivity by linking macromolecule turnover with chemosynthesis and nutrient cycling
Source: Copernicus journal article supplement (doi:10.5194/bg-22-1321-2025), 2025-03-10
Supplement: Supplementary file 1 [file bg-22-1321-2025-supplement.pdf]

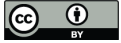

*Supplement of*

## **Animal burrowing at cold seep ecotones boosts productivity by linking macromolecule turnover with chemosynthesis and nutrient cycling**

**Maxim Rubin-Blum et al.**

*Correspondence to:* Maxim Rubin-Blum ([mrubin@ocean.org.il](mailto:mrubin@ocean.org.il))

The copyright of individual parts of the supplement might differ from the article licence.

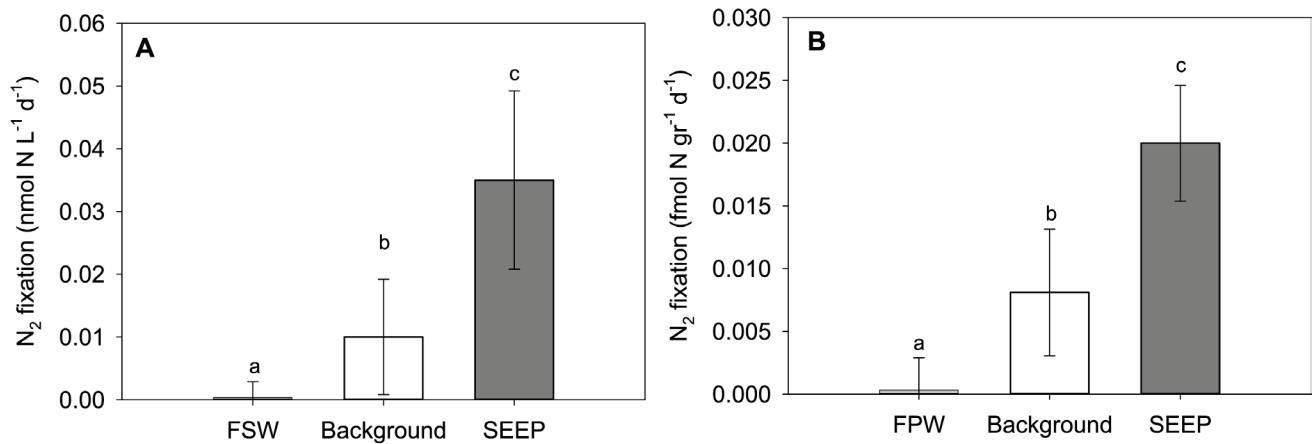

**Figure S1:**  $N_2$  fixation rates at the overlying water (A, ~1 m above seabed) and in the top sediment (B, upper 3 cm) in an active SEEP site (AG16-17BC1, grey) and in a background station (AG16-15BC1). The plot shows averages and corresponding standard deviation of three replicates. Filtered seawater (FSW) or filtered porewater (FPW) served as a control.

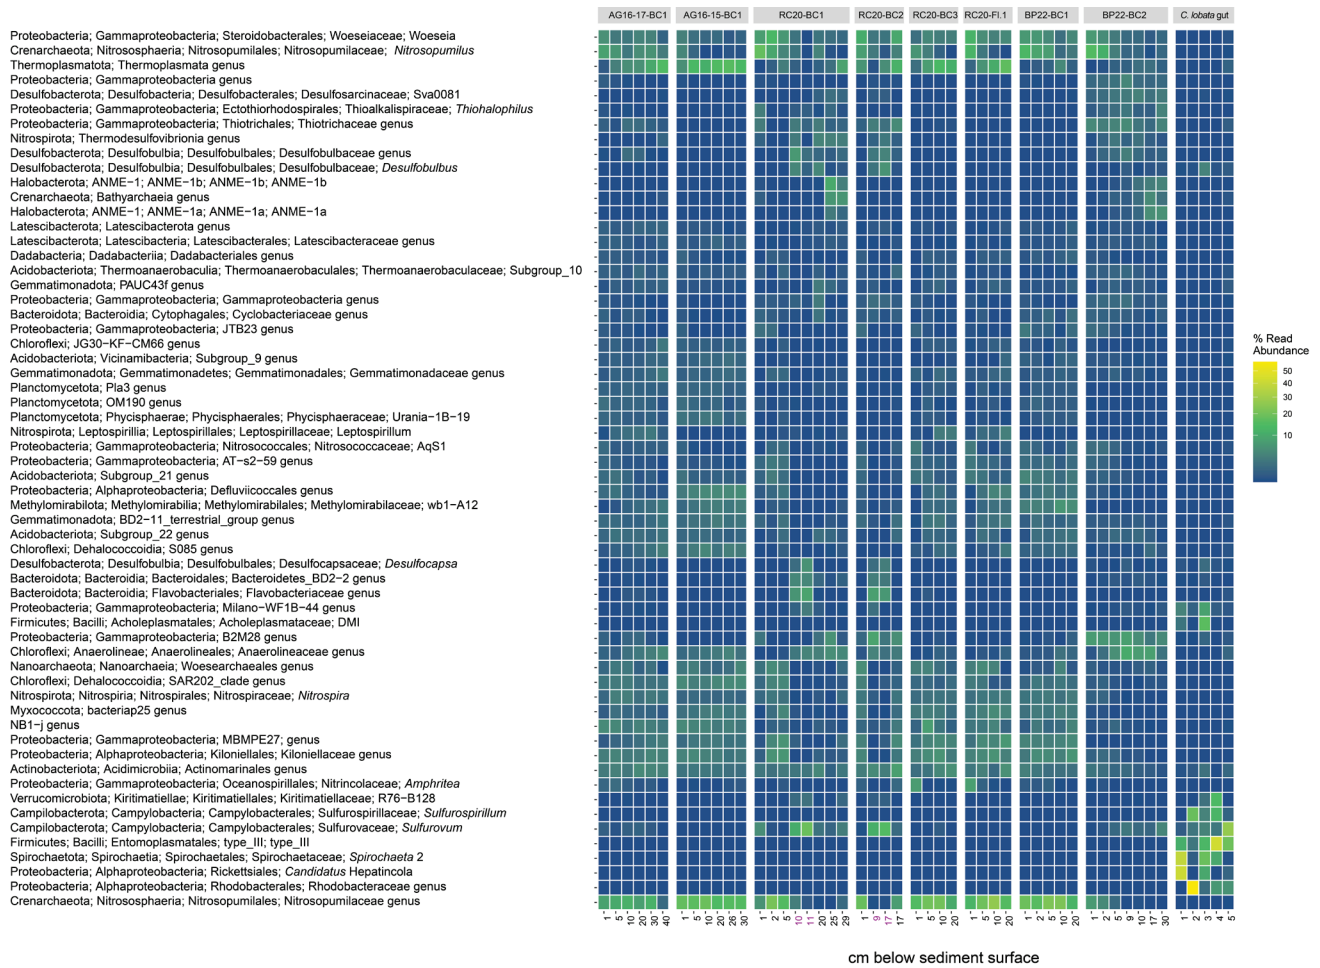

**Figure S2:** Read abundance of the top 50 most prevalent prokaryote taxa at the genus level, in bioturbated sediments from Palmahim Disturbance seep pockmark and the hindgut of the ghost shrimp *Callinectes lobata*.
